# Supplementary material
Source: publisher figshare collection journal article supplement (https://acs.figshare.com/ndownloader/files/4224550)

Supporting information for

**Semiconducting Divalent Metal Oxides As  
Blocking Layer Material for SnO<sub>2</sub>-based Dye  
Sensitized Solar Cell**

Min-Hye Kim and Young-Uk Kwon\*

*Research Institute of Advanced Nanomaterials, Department of Chemistry and BK-21 School  
of Chemical Materials Science, Sungkyunkwan University, Suwon, 440-746, Korea*

**1. Cross sectional SEM images of SnO<sub>2</sub> electrodes: (a) Unmodified SnO<sub>2</sub>, (b) Cd-SnO<sub>2</sub>, (c) Zn-SnO<sub>2</sub>, (d) Ni-SnO<sub>2</sub>, (e) Cu-SnO<sub>2</sub>, and (f) Pb-SnO<sub>2</sub>.**

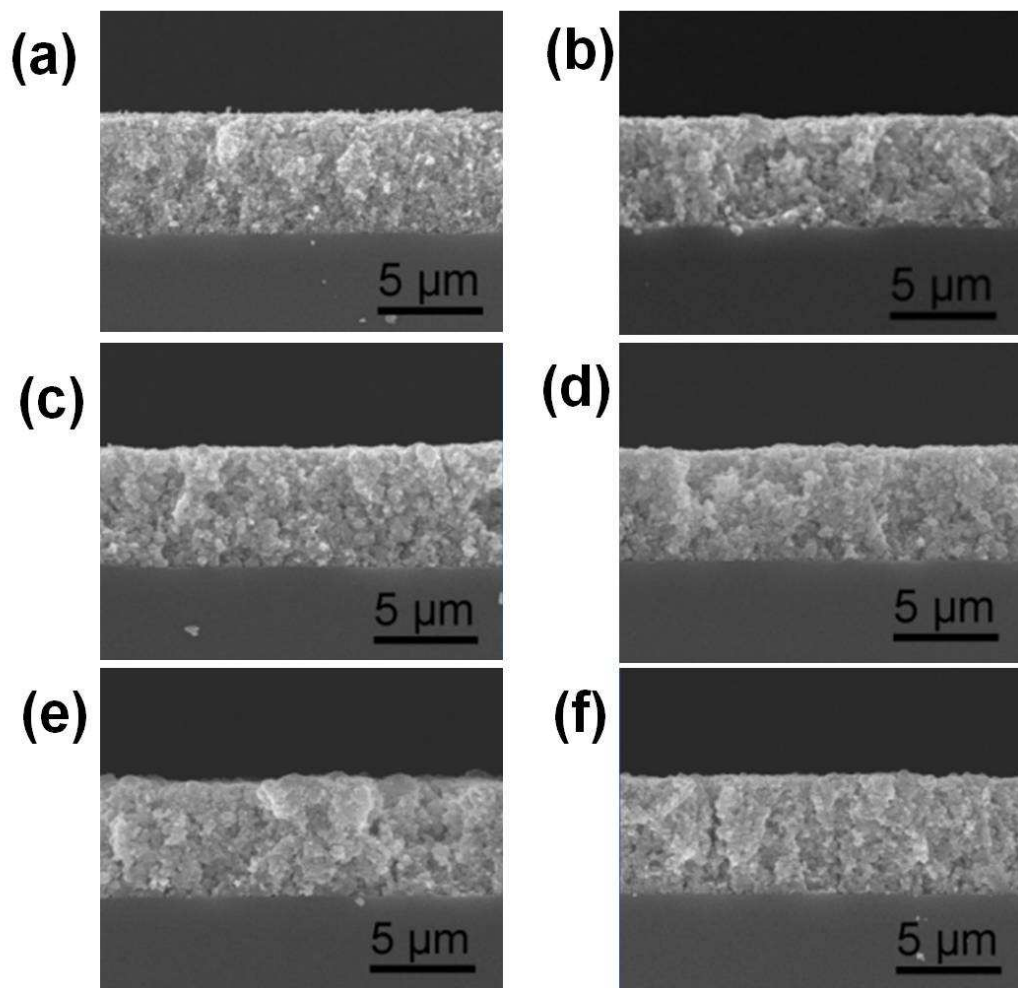

**2. TEM images of SnO<sub>2</sub> electrodes: (a) Zn-SnO<sub>2</sub>, (b) Ni-SnO<sub>2</sub>, (c) Cu-SnO<sub>2</sub>, and (d) Pb-SnO<sub>2</sub>.**

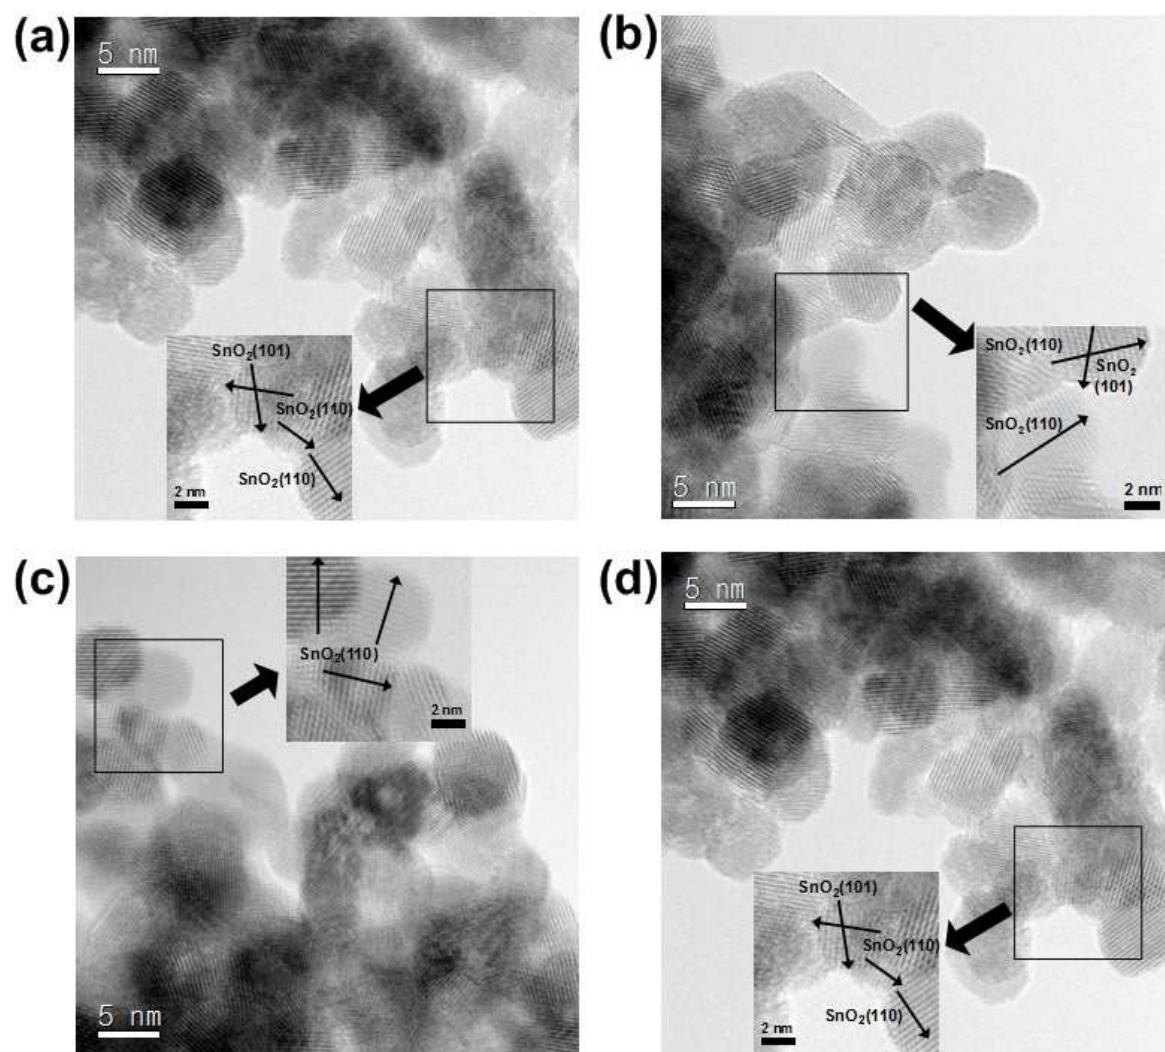

Supplement: Supplementary file 1 [file 4224550]
